# Supplementary material
Source: Springer Nature journal article supplement (https://www.springermedizin.de/resource/supplementary/12885_2013_4716_MOESM2_ESM.pdf/9466978)

CAOV3+ VEGFR inhibitor

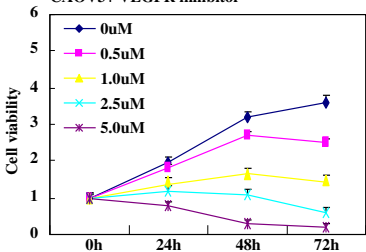

CAOV3 RhoC+ VEGFR inhibitor

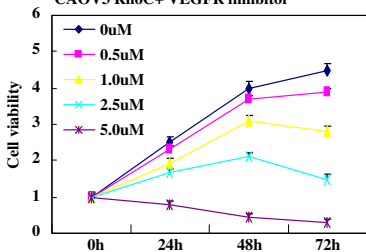CAOV3+ TGF- $\beta$ 1 R inhibitor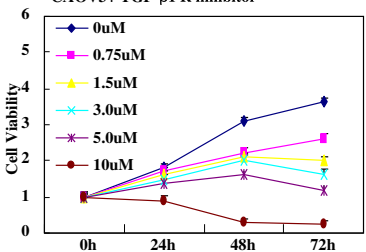CAOV3 RhoC+ TGF- $\beta$ 1 R inhibitor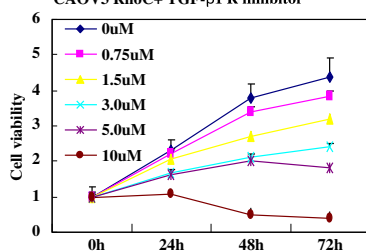

OVCAR3+VEGF

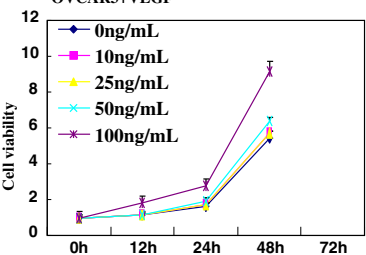

OVCAR3 siRhoC+VEGF

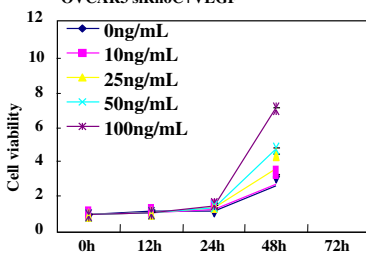OVCAR3+TGF- $\beta$ 1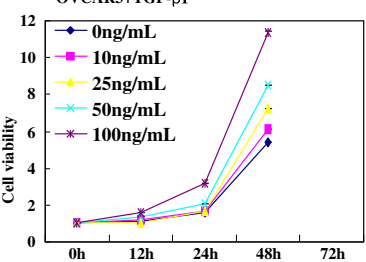OVCAR3 siRhoC+TGF- $\beta$ 1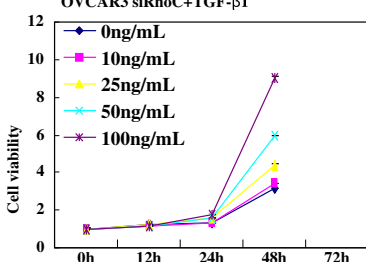

Supplement: MOESM2 [file 9466978]
